# Supplementary material
Source: publisher figshare collection journal article supplement (https://acs.figshare.com/ndownloader/files/4578895)
Supplement: Supplementary file 1 [file 4578895]

data_st260

_audit_creation_method            SHELXL-97
_chemical_name_systematic
;
 ?
;
_chemical_name_common             ?
_chemical_melting_point           ?
_chemical_formula_moiety          ?
_chemical_formula_sum
 'C84 H104 N4 O34'
_chemical_formula_weight          1713.71

loop_
 _atom_type_symbol
 _atom_type_description
 _atom_type_scat_dispersion_real
 _atom_type_scat_dispersion_imag
 _atom_type_scat_source
 'C'  'C'   0.0033   0.0016
 'International Tables Vol C Tables 4.2.6.8 and 6.1.1.4'
 'H'  'H'   0.0000   0.0000
 'International Tables Vol C Tables 4.2.6.8 and 6.1.1.4'
 'N'  'N'   0.0061   0.0033
 'International Tables Vol C Tables 4.2.6.8 and 6.1.1.4'
 'O'  'O'   0.0106   0.0060
 'International Tables Vol C Tables 4.2.6.8 and 6.1.1.4'

_symmetry_cell_setting            Monoclinic
_symmetry_space_group_name_H-M    P21

loop_
 _symmetry_equiv_pos_as_xyz
 'x, y, z'
 '-x, y+1/2, -z'

_cell_length_a                    13.1076(6)
_cell_length_b                    18.9646(9)
_cell_length_c                    17.8250(9)
_cell_angle_alpha                 89.99
_cell_angle_beta                  96.716(3)
_cell_angle_gamma                 90.00
_cell_volume                      4400.5(4)
_cell_formula_units_Z             2
_cell_measurement_temperature     150(1)
_cell_measurement_reflns_used     ?
_cell_measurement_theta_min       ?
_cell_measurement_theta_max       ?

_exptl_crystal_description        block
_exptl_crystal_colour             red
_exptl_crystal_size_max           0.32
_exptl_crystal_size_mid           0.28
_exptl_crystal_size_min           0.15
_exptl_crystal_density_meas       ?
_exptl_crystal_density_diffrn     1.293
_exptl_crystal_density_method     'not measured'
_exptl_crystal_F_000              1816
_exptl_absorpt_coefficient_mu     0.101
_exptl_absorpt_correction_type    none
_exptl_absorpt_correction_T_min   ?
_exptl_absorpt_correction_T_max   ?
_exptl_absorpt_process_details    ?

_exptl_special_details
;
 ?
;

_diffrn_ambient_temperature       293(2)
_diffrn_radiation_wavelength      0.71069
_diffrn_radiation_type            MoK\a
_diffrn_radiation_source          'fine-focus sealed tube'
_diffrn_radiation_monochromator   graphite
_diffrn_measurement_device_type   'CCD Saphire 3 Xcalibur'
_diffrn_measurement_method        'omega scan'
_diffrn_detector_area_resol_mean  19.64
_diffrn_standards_number          ?
_diffrn_standards_interval_count  ?
_diffrn_standards_interval_time   ?
_diffrn_standards_decay_%         ?
_diffrn_reflns_number             32133
_diffrn_reflns_av_R_equivalents   0.0357
_diffrn_reflns_av_sigmaI/netI     0.1356
_diffrn_reflns_limit_h_min        -16
_diffrn_reflns_limit_h_max        10
_diffrn_reflns_limit_k_min        -24
_diffrn_reflns_limit_k_max        24
_diffrn_reflns_limit_l_min        -22
_diffrn_reflns_limit_l_max        22
_diffrn_reflns_theta_min          2.66
_diffrn_reflns_theta_max          27.00
_reflns_number_total              18636
_reflns_number_gt                 8732
_reflns_threshold_expression      >2sigma(I)

_computing_data_collection
'CrysAlis CCD, Oxford Diffraction Ltd.,Version 1.171.26'
_computing_cell_refinement
'CrysAlis RED, Oxford Diffraction Ltd.,Version 1.171.26'
_computing_data_reduction
'CrysAlis RED, Oxford Diffraction Ltd.,Version 1.171.26'

_computing_structure_solution     'SIR-97_(Altomare & al., 1998)'
_computing_structure_refinement   'SHELXL-97 (Sheldrick, 1997)'
_computing_molecular_graphics     'PLATON_(Spek, 1998)'
_computing_publication_material   'SHELXL-97 (Sheldrick, 1997)'

_refine_special_details
;
 Refinement of F^2^ against ALL reflections.  The weighted R-factor wR and
 goodness of fit S are based on F^2^, conventional R-factors R are based
 on F, with F set to zero for negative F^2^. The threshold expression of
 F^2^ > 2sigma(F^2^) is used only for calculating R-factors(gt) etc. and is
 not relevant to the choice of reflections for refinement.  R-factors based
 on F^2^ are statistically about twice as large as those based on F, and R-
 factors based on ALL data will be even larger.
;

_refine_ls_structure_factor_coef  Fsqd
_refine_ls_matrix_type            full
_refine_ls_weighting_scheme       calc
_refine_ls_weighting_details
 'calc w=1/[\s^2^(Fo^2^)+(0.0983P)^2^+0.0000P] where P=(Fo^2^+2Fc^2^)/3'
_atom_sites_solution_primary      direct
_atom_sites_solution_secondary    difmap
_atom_sites_solution_hydrogens    geom
_refine_ls_hydrogen_treatment     constr
_refine_ls_extinction_method      SHELXL
_refine_ls_extinction_coef        0.0022(5)
_refine_ls_extinction_expression
 'Fc^*^=kFc[1+0.001xFc^2^\l^3^/sin(2\q)]^-1/4^'
_refine_ls_abs_structure_details
 'Flack H D (1983), Acta Cryst. A39, 876-881'
_refine_ls_abs_structure_Flack    0.9(9)
_refine_ls_number_reflns          18636
_refine_ls_number_parameters      1064
_refine_ls_number_restraints      1
_refine_ls_R_factor_all           0.1211
_refine_ls_R_factor_gt            0.0629
_refine_ls_wR_factor_ref          0.1718
_refine_ls_wR_factor_gt           0.1593
_refine_ls_goodness_of_fit_ref    0.852
_refine_ls_restrained_S_all       0.852
_refine_ls_shift/su_max           1.178
_refine_ls_shift/su_mean          0.033

loop_
 _atom_site_label
 _atom_site_type_symbol
 _atom_site_fract_x
 _atom_site_fract_y
 _atom_site_fract_z
 _atom_site_U_iso_or_equiv
 _atom_site_adp_type
 _atom_site_occupancy
 _atom_site_symmetry_multiplicity
 _atom_site_calc_flag
 _atom_site_refinement_flags
 _atom_site_disorder_assembly
 _atom_site_disorder_group
O201 O 0.0665(4) 0.4296(3) 0.3795(2) 0.0960(14) Uani 1 1 d . . .
O202 O 0.9415(5) 0.0863(3) 0.6048(3) 0.138(2) Uani 1 1 d . . .
O203 O 0.8462(8) -0.3798(6) 0.3489(3) 0.280(6) Uani 1 1 d . . .
O204 O 0.9215(6) 0.1114(5) -0.1800(5) 0.200(3) Uani 1 1 d . . .
O205 O 0.6181(10) 0.0856(6) 0.6391(9) 0.204(8) Uani 0.50 1 d P . .
O206 O 0.4190(14) 0.5146(7) 0.3300(6) 0.190(7) Uani 0.50 1 d P . .
N1 N 0.1936(2) 0.46005(18) 0.00745(19) 0.0320(8) Uani 1 1 d . . .
H1 H 0.1950 0.4453 -0.0380 0.038 Uiso 1 1 calc R . .
O1 O 0.5997(3) 0.3010(2) -0.0581(3) 0.0829(13) Uani 1 1 d . . .
O2 O 0.8658(5) 0.1799(3) -0.0290(4) 0.160(3) Uani 1 1 d . . .
O3 O 0.9069(3) 0.2317(3) 0.1040(5) 0.199(4) Uani 1 1 d . . .
H3 H 0.9188 0.2051 0.0698 0.298 Uiso 1 1 calc R . .
O4 O 0.6732(3) 0.3963(3) 0.1844(3) 0.0891(17) Uani 1 1 d . . .
H4 H 0.6225 0.4210 0.1725 0.134 Uiso 1 1 calc R . .
O5 O 0.4844(2) 0.4393(2) 0.1311(2) 0.0641(11) Uani 1 1 d . . .
O6 O 0.2681(3) 0.38811(18) -0.09420(18) 0.0537(9) Uani 1 1 d . . .
C1 C 0.6612(5) 0.3014(3) 0.0061(4) 0.0582(16) Uani 1 1 d . . .
C2 C 0.7521(5) 0.2562(4) 0.0150(5) 0.095(2) Uani 1 1 d . . .
C3 C 0.8102(5) 0.2671(4) 0.0832(5) 0.0769(19) Uani 1 1 d . . .
C4 C 0.7921(5) 0.3113(4) 0.1443(5) 0.090(3) Uani 1 1 d . . .
C5 C 0.6897(6) 0.3533(3) 0.1246(5) 0.079(2) Uani 1 1 d . . .
C6 C 0.6394(4) 0.3459(4) 0.0607(4) 0.0703(18) Uani 1 1 d . . .
C7 C 0.5533(3) 0.3938(3) 0.0246(3) 0.0569(16) Uani 1 1 d . . .
C8 C 0.4632(4) 0.4168(3) 0.0652(3) 0.0491(13) Uani 1 1 d . . .
C9 C 0.3662(3) 0.4191(2) 0.0225(3) 0.0358(11) Uani 1 1 d . . .
C10 C 0.3503(4) 0.3873(2) -0.0524(3) 0.0451(12) Uani 1 1 d . . .
C11 C 0.4307(4) 0.3448(3) -0.0789(4) 0.0584(15) Uani 1 1 d . . .
H11 H 0.4172 0.3168 -0.1218 0.070 Uiso 1 1 calc R . .
C12 C 0.5191(5) 0.3464(3) -0.0428(4) 0.0670(18) Uani 1 1 d . . .
C13 C 0.7774(6) 0.2012(4) -0.0343(5) 0.090(2) Uani 1 1 d . . .
C14 C 0.7062(7) 0.1840(5) -0.1006(7) 0.139(4) Uani 1 1 d . . .
H14A H 0.7343 0.1466 -0.1282 0.209 Uiso 1 1 calc R . .
H14B H 0.6955 0.2248 -0.1324 0.209 Uiso 1 1 calc R . .
H14C H 0.6419 0.1691 -0.0851 0.209 Uiso 1 1 calc R . .
C15 C 0.8518(5) 0.3249(5) 0.2194(7) 0.173(6) Uani 1 1 d . . .
H15A H 0.8159 0.3586 0.2467 0.259 Uiso 1 1 calc R . .
H15B H 0.9183 0.3432 0.2122 0.259 Uiso 1 1 calc R . .
H15C H 0.8597 0.2817 0.2475 0.259 Uiso 1 1 calc R . .
C16 C 0.6003(4) 0.4637(3) -0.0001(3) 0.0535(14) Uani 1 1 d . . .
H16A H 0.6581 0.4536 -0.0268 0.080 Uiso 1 1 calc R . .
H16B H 0.6224 0.4916 0.0438 0.080 Uiso 1 1 calc R . .
H16C H 0.5496 0.4893 -0.0325 0.080 Uiso 1 1 calc R . .
C17 C 0.2808(3) 0.4527(2) 0.0522(2) 0.0325(10) Uani 1 1 d . . .
C18 C 0.2862(3) 0.4780(3) 0.1319(3) 0.0493(13) Uani 1 1 d . . .
H18A H 0.2212 0.4978 0.1405 0.074 Uiso 1 1 calc R . .
H18B H 0.3386 0.5135 0.1406 0.074 Uiso 1 1 calc R . .
H18C H 0.3025 0.4392 0.1658 0.074 Uiso 1 1 calc R . .
C19 C 0.0971(3) 0.4889(2) 0.0230(2) 0.0295(10) Uani 1 1 d . . .
H19 H 0.1086 0.5163 0.0699 0.035 Uiso 1 1 calc R . .
C20 C 0.0513(3) 0.5373(2) -0.0396(3) 0.0369(11) Uani 1 1 d . . .
H20A H 0.1000 0.5746 -0.0466 0.044 Uiso 1 1 calc R . .
H20B H 0.0398 0.5107 -0.0863 0.044 Uiso 1 1 calc R . .
C21 C -0.0473(3) 0.5692(3) -0.0233(3) 0.0461(12) Uani 1 1 d . . .
H21A H -0.0748 0.5984 -0.0656 0.055 Uiso 1 1 calc R . .
H21B H -0.0352 0.5991 0.0210 0.055 Uiso 1 1 calc R . .
N31 N 0.0626(2) 0.3828(2) 0.0943(2) 0.0369(9) Uani 1 1 d . . .
H31 H 0.0537 0.3967 0.1390 0.044 Uiso 1 1 calc R . .
O31 O 0.3057(2) 0.20197(15) 0.35948(15) 0.0345(7) Uani 1 1 d . . .
O32 O 0.5368(2) 0.07091(17) 0.47559(17) 0.0442(8) Uani 1 1 d . . .
O33 O 0.5334(2) 0.00055(17) 0.35301(18) 0.0472(9) Uani 1 1 d . . .
H33 H 0.5528 0.0129 0.3964 0.071 Uiso 1 1 calc R . .
O34 O 0.3050(2) 0.06330(16) 0.14156(16) 0.0427(8) Uani 1 1 d . . .
H34 H 0.2614 0.0929 0.1272 0.064 Uiso 1 1 calc R . .
O35 O 0.2177(2) 0.18609(15) 0.10447(16) 0.0350(7) Uani 1 1 d . . .
O36 O 0.1088(2) 0.38586(17) 0.23701(17) 0.0473(8) Uani 1 1 d . . .
C31 C 0.3481(3) 0.1428(2) 0.3275(2) 0.0278(9) Uani 1 1 d . . .
C32 C 0.4226(3) 0.1011(2) 0.3670(2) 0.0336(10) Uani 1 1 d . . .
C33 C 0.4578(3) 0.0440(2) 0.3229(2) 0.0297(10) Uani 1 1 d . . .
C34 C 0.4179(3) 0.0299(2) 0.2491(2) 0.0325(10) Uani 1 1 d . . .
C35 C 0.3420(3) 0.0761(2) 0.2150(2) 0.0308(10) Uani 1 1 d . . .
C36 C 0.3087(3) 0.1331(2) 0.2550(2) 0.0284(10) Uani 1 1 d . . .
C37 C 0.2200(3) 0.1831(2) 0.2367(2) 0.0309(10) Uani 1 1 d . . .
C38 C 0.2017(3) 0.2216(2) 0.1612(2) 0.0313(10) Uani 1 1 d . . .
C39 C 0.1559(3) 0.2903(2) 0.1616(2) 0.0324(10) Uani 1 1 d . . .
C40 C 0.1529(3) 0.3269(2) 0.2327(2) 0.0340(10) Uani 1 1 d . . .
C41 C 0.2073(3) 0.2976(2) 0.3014(2) 0.0362(10) Uani 1 1 d . . .
H41 H 0.2165 0.3245 0.3453 0.043 Uiso 1 1 calc R . .
C42 C 0.2432(3) 0.2334(2) 0.3012(2) 0.0337(10) Uani 1 1 d . . .
C43 C 0.4625(3) 0.1071(2) 0.4465(2) 0.0364(11) Uani 1 1 d . . .
C44 C 0.4155(3) 0.1569(3) 0.4966(3) 0.0436(12) Uani 1 1 d . . .
H44A H 0.4517 0.1545 0.5466 0.065 Uiso 1 1 calc R . .
H44B H 0.3448 0.1444 0.4984 0.065 Uiso 1 1 calc R . .
H44C H 0.4194 0.2040 0.4774 0.065 Uiso 1 1 calc R . .
C45 C 0.4542(4) -0.0310(3) 0.2059(3) 0.0495(13) Uani 1 1 d . . .
H45A H 0.4169 -0.0322 0.1562 0.074 Uiso 1 1 calc R . .
H45B H 0.4428 -0.0742 0.2318 0.074 Uiso 1 1 calc R . .
H45C H 0.5263 -0.0258 0.2019 0.074 Uiso 1 1 calc R . .
C46 C 0.1173(3) 0.1447(2) 0.2453(3) 0.0416(11) Uani 1 1 d . . .
H46A H 0.0611 0.1768 0.2338 0.062 Uiso 1 1 calc R . .
H46B H 0.1181 0.1281 0.2962 0.062 Uiso 1 1 calc R . .
H46C H 0.1093 0.1054 0.2112 0.062 Uiso 1 1 calc R . .
C47 C 0.1126(3) 0.3235(2) 0.0919(3) 0.0378(11) Uani 1 1 d . . .
C48 C 0.1246(3) 0.2894(2) 0.0164(2) 0.0411(11) Uani 1 1 d . . .
H48A H 0.0905 0.3176 -0.0237 0.062 Uiso 1 1 calc R . .
H48B H 0.0948 0.2431 0.0146 0.062 Uiso 1 1 calc R . .
H48C H 0.1963 0.2858 0.0104 0.062 Uiso 1 1 calc R . .
C49 C 0.0197(3) 0.4293(2) 0.0343(3) 0.0389(11) Uani 1 1 d . . .
H49 H 0.0078 0.4020 -0.0126 0.047 Uiso 1 1 calc R . .
C50 C -0.0812(3) 0.4596(3) 0.0514(3) 0.0513(13) Uani 1 1 d . . .
H50A H -0.0714 0.4833 0.1000 0.062 Uiso 1 1 calc R . .
H50B H -0.1300 0.4216 0.0549 0.062 Uiso 1 1 calc R . .
C51 C -0.1252(4) 0.5121(3) -0.0096(3) 0.0537(14) Uani 1 1 d . . .
H51A H -0.1451 0.4868 -0.0564 0.064 Uiso 1 1 calc R . .
H51B H -0.1863 0.5340 0.0058 0.064 Uiso 1 1 calc R . .
N61 N 0.8959(2) -0.09900(18) 0.4139(2) 0.0365(9) Uani 1 1 d . . .
H61 H 0.9163 -0.0662 0.4455 0.044 Uiso 1 1 calc R . .
O61 O 0.6660(2) 0.19244(15) 0.33687(16) 0.0360(7) Uani 1 1 d . . .
O62 O 0.4310(3) 0.3327(2) 0.2452(2) 0.0683(11) Uani 1 1 d . . .
O63 O 0.4298(2) 0.26706(17) 0.12223(19) 0.0516(9) Uani 1 1 d . . .
H63 H 0.4172 0.2985 0.1513 0.077 Uiso 1 1 calc R . .
O64 O 0.6397(3) 0.06770(18) 0.10863(18) 0.0563(9) Uani 1 1 d . . .
H64 H 0.6828 0.0446 0.1351 0.084 Uiso 1 1 calc R . .
O65 O 0.7218(3) -0.01395(18) 0.22064(19) 0.0632(11) Uani 1 1 d . . .
O66 O 0.8704(2) 0.02064(17) 0.47420(17) 0.0430(8) Uani 1 1 d . . .
C61 C 0.6155(3) 0.1887(2) 0.2628(2) 0.0327(10) Uani 1 1 d . . .
C62 C 0.5412(3) 0.2372(2) 0.2329(3) 0.0381(11) Uani 1 1 d . . .
C63 C 0.5016(3) 0.2240(3) 0.1570(3) 0.0414(12) Uani 1 1 d . . .
C64 C 0.5335(3) 0.1678(3) 0.1166(3) 0.0443(13) Uani 1 1 d . . .
C65 C 0.6083(3) 0.1222(2) 0.1492(3) 0.0411(12) Uani 1 1 d . . .
C66 C 0.6497(3) 0.1337(2) 0.2238(2) 0.0328(10) Uani 1 1 d . . .
C67 C 0.7409(3) 0.1003(2) 0.2739(2) 0.0321(10) Uani 1 1 d . . .
C68 C 0.7502(3) 0.0211(2) 0.2791(3) 0.0377(11) Uani 1 1 d . . .
C69 C 0.8020(3) -0.0068(2) 0.3489(2) 0.0323(10) Uani 1 1 d . . .
C70 C 0.8175(3) 0.0391(2) 0.4126(2) 0.0324(10) Uani 1 1 d . . .
C71 C 0.7670(3) 0.1071(2) 0.4120(2) 0.0325(10) Uani 1 1 d . . .
H71 H 0.7623 0.1315 0.4568 0.039 Uiso 1 1 calc R . .
C72 C 0.7284(3) 0.1333(2) 0.3471(3) 0.0309(10) Uani 1 1 d . . .
C73 C 0.5028(3) 0.2967(3) 0.2746(3) 0.0510(13) Uani 1 1 d . . .
C74 C 0.5480(5) 0.3144(3) 0.3539(3) 0.0737(18) Uani 1 1 d . . .
H74A H 0.5132 0.3546 0.3715 0.111 Uiso 1 1 calc R . .
H74B H 0.6198 0.3250 0.3545 0.111 Uiso 1 1 calc R . .
H74C H 0.5400 0.2749 0.3864 0.111 Uiso 1 1 calc R . .
C75 C 0.4881(4) 0.1547(3) 0.0347(3) 0.0539(14) Uani 1 1 d . . .
H75A H 0.4366 0.1896 0.0198 0.081 Uiso 1 1 calc R . .
H75B H 0.4575 0.1086 0.0306 0.081 Uiso 1 1 calc R . .
H75C H 0.5415 0.1576 0.0023 0.081 Uiso 1 1 calc R . .
C76 C 0.8426(3) 0.1264(3) 0.2460(3) 0.0462(12) Uani 1 1 d . . .
H76A H 0.8407 0.1768 0.2409 0.069 Uiso 1 1 calc R . .
H76B H 0.8502 0.1054 0.1980 0.069 Uiso 1 1 calc R . .
H76C H 0.8997 0.1132 0.2820 0.069 Uiso 1 1 calc R . .
C77 C 0.8397(3) -0.0778(2) 0.3529(2) 0.0307(10) Uani 1 1 d . . .
C78 C 0.8179(4) -0.1278(2) 0.2885(3) 0.0471(12) Uani 1 1 d . . .
H78A H 0.8500 -0.1724 0.3016 0.071 Uiso 1 1 calc R . .
H78B H 0.8447 -0.1090 0.2448 0.071 Uiso 1 1 calc R . .
H78C H 0.7451 -0.1343 0.2776 0.071 Uiso 1 1 calc R . .
C79 C 0.9301(3) -0.1715(2) 0.4370(3) 0.0382(11) Uani 1 1 d . . .
H79 H 0.9283 -0.2016 0.3922 0.046 Uiso 1 1 calc R . .
C80 C 1.0401(3) -0.1674(3) 0.4765(3) 0.0472(13) Uani 1 1 d . . .
H80A H 1.0854 -0.1503 0.4411 0.057 Uiso 1 1 calc R . .
H80B H 1.0429 -0.1343 0.5182 0.057 Uiso 1 1 calc R . .
C81 C 1.0768(3) -0.2400(3) 0.5061(3) 0.0533(14) Uani 1 1 d . . .
H81A H 1.1446 -0.2358 0.5340 0.064 Uiso 1 1 calc R . .
H81B H 1.0813 -0.2717 0.4640 0.064 Uiso 1 1 calc R . .
N91 N 0.7523(2) -0.20358(18) 0.45231(19) 0.0328(8) Uani 1 1 d . . .
H91 H 0.7399 -0.2369 0.4198 0.039 Uiso 1 1 calc R . .
O91 O 0.3065(2) -0.17906(16) 0.26530(16) 0.0387(7) Uani 1 1 d . . .
O92 O 0.0228(2) -0.09060(19) 0.1685(2) 0.0600(10) Uani 1 1 d . . .
O93 O 0.02908(19) -0.01203(16) 0.28359(19) 0.0456(8) Uani 1 1 d . . .
H93 H 0.0079 -0.0279 0.2419 0.068 Uiso 1 1 calc R . .
O94 O 0.3024(2) -0.03296(17) 0.47735(18) 0.0460(8) Uani 1 1 d . . .
H94 H 0.3555 -0.0553 0.4887 0.069 Uiso 1 1 calc R . .
O95 O 0.4806(2) -0.09545(17) 0.48592(17) 0.0400(8) Uani 1 1 d . . .
O96 O 0.6445(2) -0.26064(17) 0.33828(17) 0.0429(8) Uani 1 1 d . . .
C91 C 0.2528(3) -0.1260(2) 0.2982(2) 0.0351(11) Uani 1 1 d . . .
C92 C 0.1607(3) -0.0961(2) 0.2657(3) 0.0382(11) Uani 1 1 d . . .
C93 C 0.1201(3) -0.0438(2) 0.3095(3) 0.0413(12) Uani 1 1 d . . .
C94 C 0.1672(3) -0.0224(2) 0.3802(3) 0.0367(11) Uani 1 1 d . . .
C95 C 0.2585(3) -0.0539(2) 0.4100(3) 0.0340(10) Uani 1 1 d . . .
C96 C 0.3010(3) -0.1076(2) 0.3683(2) 0.0301(10) Uani 1 1 d . . .
C97 C 0.3832(3) -0.1609(2) 0.3893(2) 0.0318(10) Uani 1 1 d . . .
C98 C 0.4861(3) -0.1385(2) 0.4334(2) 0.0325(10) Uani 1 1 d . . .
C99 C 0.5772(3) -0.1740(2) 0.4164(2) 0.0307(10) Uani 1 1 d . . .
C100 C 0.5699(3) -0.2219(2) 0.3521(2) 0.0327(10) Uani 1 1 d . . .
C101 C 0.4781(3) -0.2235(2) 0.2964(2) 0.0343(10) Uani 1 1 d . . .
H101 H 0.4787 -0.2466 0.2505 0.041 Uiso 1 1 calc R . .
C102 C 0.3940(3) -0.1910(2) 0.3134(2) 0.0335(10) Uani 1 1 d . . .
C103 C 0.1087(3) -0.1163(3) 0.1930(3) 0.0482(12) Uani 1 1 d . . .
C104 C 0.1547(4) -0.1698(4) 0.1437(3) 0.0765(19) Uani 1 1 d . . .
H10A H 0.1092 -0.1765 0.0979 0.115 Uiso 1 1 calc R . .
H10B H 0.1640 -0.2138 0.1702 0.115 Uiso 1 1 calc R . .
H10C H 0.2198 -0.1529 0.1315 0.115 Uiso 1 1 calc R . .
C105 C 0.1193(3) 0.0336(3) 0.4260(3) 0.0509(13) Uani 1 1 d . . .
H10D H 0.0567 0.0501 0.3983 0.076 Uiso 1 1 calc R . .
H10E H 0.1663 0.0723 0.4356 0.076 Uiso 1 1 calc R . .
H10F H 0.1048 0.0137 0.4732 0.076 Uiso 1 1 calc R . .
C106 C 0.3389(3) -0.2174(2) 0.4405(3) 0.0454(12) Uani 1 1 d . . .
H10G H 0.2737 -0.2336 0.4167 0.068 Uiso 1 1 calc R . .
H10H H 0.3302 -0.1968 0.4886 0.068 Uiso 1 1 calc R . .
H10I H 0.3856 -0.2565 0.4478 0.068 Uiso 1 1 calc R . .
C107 C 0.6743(3) -0.1619(2) 0.4609(2) 0.0324(10) Uani 1 1 d . . .
C108 C 0.6856(3) -0.1028(2) 0.5149(2) 0.0374(11) Uani 1 1 d . . .
H10J H 0.7542 -0.1026 0.5406 0.056 Uiso 1 1 calc R . .
H10K H 0.6374 -0.1083 0.5510 0.056 Uiso 1 1 calc R . .
H10L H 0.6727 -0.0592 0.4882 0.056 Uiso 1 1 calc R . .
C109 C 0.8566(3) -0.2011(2) 0.4903(2) 0.0331(10) Uani 1 1 d . . .
H109 H 0.8578 -0.1696 0.5340 0.040 Uiso 1 1 calc R . .
C110 C 0.8919(3) -0.2740(2) 0.5183(3) 0.0381(11) Uani 1 1 d . . .
H11A H 0.8461 -0.2917 0.5530 0.046 Uiso 1 1 calc R . .
H11B H 0.8895 -0.3063 0.4760 0.046 Uiso 1 1 calc R . .
C111 C 1.0012(3) -0.2702(3) 0.5583(3) 0.0484(13) Uani 1 1 d . . .
H11C H 1.0235 -0.3171 0.5746 0.058 Uiso 1 1 calc R . .
H11D H 1.0022 -0.2408 0.6028 0.058 Uiso 1 1 calc R . .

loop_
 _atom_site_aniso_label
 _atom_site_aniso_U_11
 _atom_site_aniso_U_22
 _atom_site_aniso_U_33
 _atom_site_aniso_U_23
 _atom_site_aniso_U_13
 _atom_site_aniso_U_12
O201 0.118(3) 0.095(3) 0.071(3) -0.003(3) -0.005(3) 0.021(3)
O202 0.207(6) 0.115(5) 0.084(4) -0.007(3) -0.010(4) -0.039(4)
O203 0.409(12) 0.366(13) 0.059(4) 0.009(5) 0.008(5) 0.303(11)
O204 0.204(7) 0.224(9) 0.176(8) 0.013(6) 0.041(6) 0.036(7)
O205 0.184(11) 0.087(9) 0.289(17) -0.015(10) -0.201(12) -0.007(8)
O206 0.37(2) 0.131(11) 0.049(7) 0.011(6) -0.067(9) 0.057(12)
N1 0.0367(19) 0.031(2) 0.027(2) 0.0015(15) -0.0001(16) 0.0013(16)
O1 0.078(3) 0.051(3) 0.129(4) 0.005(3) 0.054(3) 0.002(2)
O2 0.179(5) 0.119(5) 0.207(7) 0.090(5) 0.132(5) 0.092(4)
O3 0.036(2) 0.146(5) 0.424(11) 0.223(7) 0.067(4) 0.041(3)
O4 0.0394(19) 0.110(4) 0.108(4) 0.074(3) -0.033(2) -0.019(2)
O5 0.0306(17) 0.100(3) 0.060(3) 0.018(2) -0.0029(17) 0.0029(18)
O6 0.072(2) 0.054(2) 0.037(2) -0.0035(16) 0.0156(18) 0.0032(19)
C1 0.067(4) 0.025(3) 0.093(5) 0.000(3) 0.056(4) -0.006(3)
C2 0.079(5) 0.072(5) 0.143(8) 0.041(5) 0.055(5) 0.010(4)
C3 0.077(5) 0.066(5) 0.094(6) 0.031(4) 0.036(4) -0.022(4)
C4 0.052(4) 0.084(5) 0.133(7) 0.085(5) 0.005(4) -0.009(4)
C5 0.098(5) 0.052(4) 0.098(6) -0.015(4) 0.051(5) -0.017(4)
C6 0.067(4) 0.071(5) 0.072(5) 0.024(4) 0.003(4) -0.021(3)
C7 0.032(2) 0.055(4) 0.089(4) 0.036(3) 0.027(3) 0.007(2)
C8 0.042(3) 0.053(3) 0.053(4) 0.024(3) 0.011(2) 0.007(2)
C9 0.033(2) 0.032(3) 0.044(3) 0.013(2) 0.011(2) 0.006(2)
C10 0.061(3) 0.033(3) 0.047(3) 0.007(2) 0.027(3) 0.002(2)
C11 0.052(3) 0.037(3) 0.093(5) -0.004(3) 0.039(3) -0.001(3)
C12 0.086(4) 0.021(3) 0.106(5) 0.008(3) 0.064(4) 0.007(3)
C13 0.072(4) 0.071(5) 0.139(7) 0.028(5) 0.068(5) 0.052(4)
C14 0.127(7) 0.086(6) 0.220(12) 0.011(7) 0.086(8) 0.015(6)
C15 0.047(4) 0.139(8) 0.328(15) 0.150(10) 0.004(6) 0.002(5)
C16 0.052(3) 0.041(3) 0.072(4) 0.018(3) 0.023(3) 0.004(2)
C17 0.030(2) 0.029(2) 0.038(3) 0.0053(19) -0.0001(19) 0.0041(19)
C18 0.035(2) 0.069(4) 0.041(3) -0.017(3) -0.008(2) 0.011(2)
C19 0.025(2) 0.027(2) 0.034(3) 0.0035(19) -0.0057(18) -0.0027(18)
C20 0.031(2) 0.034(3) 0.044(3) 0.007(2) -0.004(2) -0.004(2)
C21 0.038(2) 0.040(3) 0.055(3) 0.011(2) -0.013(2) 0.000(2)
N31 0.0389(19) 0.037(2) 0.034(2) 0.0106(17) 0.0019(16) 0.0081(18)
O31 0.0357(15) 0.0403(19) 0.0261(17) 0.0032(13) -0.0027(13) 0.0114(14)
O32 0.0435(17) 0.046(2) 0.0402(19) 0.0018(15) -0.0095(14) 0.0125(16)
O33 0.0491(18) 0.050(2) 0.040(2) 0.0023(15) -0.0022(15) 0.0193(16)
O34 0.0518(18) 0.0371(19) 0.0363(19) -0.0048(14) -0.0074(15) 0.0038(15)
O35 0.0385(15) 0.0337(18) 0.0315(18) -0.0024(14) -0.0022(13) -0.0020(14)
O36 0.0540(19) 0.044(2) 0.044(2) 0.0065(16) 0.0042(15) 0.0192(17)
C31 0.027(2) 0.025(2) 0.031(3) 0.0018(18) 0.0019(18) -0.0008(18)
C32 0.027(2) 0.036(3) 0.037(3) 0.001(2) -0.0016(19) -0.0042(19)
C33 0.028(2) 0.031(2) 0.030(2) 0.0067(19) 0.0003(18) 0.0018(19)
C34 0.037(2) 0.025(2) 0.036(3) 0.0003(19) 0.006(2) -0.0007(19)
C35 0.033(2) 0.026(2) 0.031(3) 0.0021(19) -0.0020(19) -0.0016(19)
C36 0.023(2) 0.029(2) 0.033(3) 0.0004(19) -0.0002(18) -0.0058(18)
C37 0.034(2) 0.025(2) 0.032(2) 0.0102(19) -0.0037(18) 0.0012(19)
C38 0.030(2) 0.031(3) 0.032(3) 0.009(2) 0.0012(19) -0.0060(19)
C39 0.033(2) 0.035(3) 0.028(2) 0.004(2) 0.0000(18) 0.0068(19)
C40 0.032(2) 0.030(3) 0.040(3) 0.009(2) 0.0036(19) 0.002(2)
C41 0.045(2) 0.039(3) 0.022(2) -0.004(2) -0.0014(19) -0.003(2)
C42 0.032(2) 0.037(3) 0.032(3) 0.001(2) 0.0019(19) 0.003(2)
C43 0.044(3) 0.033(3) 0.032(3) 0.002(2) 0.004(2) -0.001(2)
C44 0.049(3) 0.046(3) 0.033(3) -0.004(2) -0.006(2) 0.004(2)
C45 0.059(3) 0.039(3) 0.048(3) -0.003(2) -0.006(2) 0.007(2)
C46 0.038(2) 0.043(3) 0.043(3) 0.016(2) 0.002(2) -0.003(2)
C47 0.033(2) 0.036(3) 0.043(3) 0.003(2) -0.002(2) -0.006(2)
C48 0.050(3) 0.037(3) 0.034(3) 0.007(2) -0.007(2) 0.003(2)
C49 0.043(2) 0.032(3) 0.040(3) 0.015(2) -0.005(2) 0.004(2)
C50 0.030(2) 0.054(3) 0.068(4) 0.020(3) -0.001(2) 0.001(2)
C51 0.043(3) 0.046(3) 0.070(4) 0.017(3) -0.003(2) 0.006(2)
N61 0.0350(19) 0.029(2) 0.047(2) 0.0085(17) 0.0099(17) 0.0005(17)
O61 0.0391(15) 0.0319(17) 0.0365(19) 0.0037(13) 0.0019(14) 0.0054(14)
O62 0.055(2) 0.063(3) 0.091(3) 0.028(2) 0.027(2) 0.032(2)
O63 0.0321(16) 0.051(2) 0.069(2) 0.0267(18) -0.0046(15) 0.0001(15)
O64 0.086(2) 0.041(2) 0.038(2) 0.0055(16) -0.0109(17) 0.0043(19)
O65 0.107(3) 0.039(2) 0.037(2) -0.0018(17) -0.0162(19) 0.019(2)
O66 0.0408(16) 0.049(2) 0.0373(19) 0.0094(15) -0.0054(15) -0.0015(15)
C61 0.035(2) 0.030(3) 0.033(3) 0.011(2) 0.006(2) -0.001(2)
C62 0.034(2) 0.031(3) 0.049(3) 0.012(2) 0.003(2) 0.005(2)
C63 0.027(2) 0.045(3) 0.050(3) 0.013(3) -0.001(2) -0.009(2)
C64 0.048(3) 0.038(3) 0.042(3) 0.017(2) -0.016(2) -0.017(2)
C65 0.052(3) 0.029(3) 0.040(3) 0.009(2) -0.003(2) -0.002(2)
C66 0.038(2) 0.028(2) 0.031(3) 0.009(2) 0.002(2) -0.001(2)
C67 0.027(2) 0.030(2) 0.040(3) 0.004(2) 0.0089(18) -0.0017(18)
C68 0.039(2) 0.035(3) 0.039(3) -0.002(2) 0.006(2) 0.008(2)
C69 0.031(2) 0.031(3) 0.035(3) 0.009(2) 0.0024(19) -0.0031(19)
C70 0.023(2) 0.038(3) 0.036(3) 0.007(2) 0.0029(19) -0.0056(19)
C71 0.033(2) 0.031(3) 0.033(3) 0.001(2) 0.0013(19) -0.0002(19)
C72 0.025(2) 0.025(2) 0.043(3) 0.005(2) 0.0031(19) 0.0017(18)
C73 0.037(3) 0.057(3) 0.061(4) 0.026(3) 0.014(2) 0.015(3)
C74 0.092(4) 0.060(4) 0.073(4) -0.001(3) 0.025(3) 0.025(3)
C75 0.055(3) 0.050(3) 0.050(3) 0.020(3) -0.020(3) -0.020(3)
C76 0.039(2) 0.046(3) 0.055(3) 0.010(2) 0.011(2) 0.002(2)
C77 0.029(2) 0.036(3) 0.028(2) 0.0080(19) 0.0076(19) 0.0000(19)
C78 0.057(3) 0.035(3) 0.048(3) 0.008(2) -0.001(2) 0.005(2)
C79 0.032(2) 0.037(3) 0.046(3) 0.009(2) 0.004(2) 0.003(2)
C80 0.025(2) 0.042(3) 0.074(4) 0.015(3) 0.006(2) 0.004(2)
C81 0.023(2) 0.052(3) 0.083(4) 0.023(3) 0.000(2) 0.011(2)
N91 0.0315(18) 0.027(2) 0.038(2) -0.0011(16) -0.0012(16) 0.0044(16)
O91 0.0344(15) 0.0403(19) 0.0393(18) 0.0003(14) -0.0044(14) 0.0104(14)
O92 0.0394(18) 0.065(2) 0.070(2) 0.0208(19) -0.0157(17) 0.0075(17)
O93 0.0247(14) 0.0383(19) 0.074(2) 0.0187(17) 0.0048(14) 0.0064(14)
O94 0.0407(17) 0.054(2) 0.045(2) -0.0059(16) 0.0105(15) 0.0094(16)
O95 0.0324(15) 0.047(2) 0.0405(19) -0.0032(16) 0.0026(13) 0.0071(14)
O96 0.0364(16) 0.043(2) 0.049(2) -0.0028(15) 0.0056(14) 0.0091(15)
C91 0.025(2) 0.039(3) 0.042(3) 0.003(2) 0.006(2) 0.008(2)
C92 0.026(2) 0.036(3) 0.051(3) 0.014(2) -0.002(2) 0.003(2)
C93 0.022(2) 0.039(3) 0.064(3) 0.019(2) 0.011(2) 0.010(2)
C94 0.029(2) 0.028(3) 0.054(3) 0.002(2) 0.012(2) 0.0070(19)
C95 0.025(2) 0.030(3) 0.048(3) 0.006(2) 0.008(2) 0.0012(19)
C96 0.0196(19) 0.032(3) 0.038(3) 0.002(2) 0.0027(18) 0.0033(18)
C97 0.028(2) 0.032(2) 0.035(3) -0.0013(19) 0.0001(18) 0.0078(19)
C98 0.033(2) 0.034(3) 0.030(3) 0.009(2) 0.0038(19) 0.001(2)
C99 0.028(2) 0.036(3) 0.029(2) 0.0022(19) 0.0033(17) 0.0020(19)
C100 0.029(2) 0.030(3) 0.041(3) 0.008(2) 0.0099(19) 0.0114(19)
C101 0.030(2) 0.036(3) 0.035(3) -0.001(2) -0.0028(18) 0.000(2)
C102 0.027(2) 0.032(3) 0.040(3) 0.001(2) -0.0009(19) 0.0025(19)
C103 0.039(3) 0.043(3) 0.061(3) 0.013(3) -0.003(2) 0.007(2)
C104 0.072(4) 0.097(5) 0.053(4) -0.012(3) -0.029(3) 0.028(4)
C105 0.036(2) 0.044(3) 0.075(4) -0.001(3) 0.019(2) 0.011(2)
C106 0.035(2) 0.043(3) 0.058(3) 0.006(2) 0.004(2) -0.001(2)
C107 0.033(2) 0.029(2) 0.035(3) 0.007(2) 0.0059(19) -0.004(2)
C108 0.029(2) 0.037(3) 0.045(3) -0.002(2) -0.0016(19) 0.004(2)
C109 0.025(2) 0.037(3) 0.037(3) 0.009(2) 0.0012(18) 0.0047(19)
C110 0.030(2) 0.032(3) 0.052(3) 0.012(2) 0.004(2) -0.0017(19)
C111 0.027(2) 0.052(3) 0.064(3) 0.031(3) -0.004(2) 0.006(2)

_geom_special_details
;
 All esds (except the esd in the dihedral angle between two l.s. planes)
 are estimated using the full covariance matrix.  The cell esds are taken
 into account individually in the estimation of esds in distances, angles
 and torsion angles; correlations between esds in cell parameters are only
 used when they are defined by crystal symmetry.  An approximate (isotropic)
 treatment of cell esds is used for estimating esds involving l.s. planes.
;

loop_
 _geom_bond_atom_site_label_1
 _geom_bond_atom_site_label_2
 _geom_bond_distance
 _geom_bond_site_symmetry_2
 _geom_bond_publ_flag
O205 O206 1.554(19) 2_646 ?
O206 O205 1.554(19) 2_656 ?
N1 C17 1.322(5) . ?
N1 C19 1.435(5) . ?
N1 H1 0.8600 . ?
O1 C1 1.320(7) . ?
O1 C12 1.414(6) . ?
O2 C13 1.219(7) . ?
O3 C3 1.443(8) . ?
O3 H3 0.8200 . ?
O4 C5 1.380(8) . ?
O4 H4 0.8200 . ?
O5 C8 1.249(6) . ?
O6 C10 1.236(6) . ?
C1 C6 1.344(9) . ?
C1 C2 1.462(9) . ?
C2 C3 1.372(10) . ?
C2 C13 1.427(11) . ?
C3 C4 1.417(10) . ?
C4 C15 1.492(13) . ?
C4 C5 1.564(9) . ?
C5 C6 1.255(9) . ?
C6 C7 1.531(7) . ?
C7 C8 1.519(7) . ?
C7 C12 1.525(8) . ?
C7 C16 1.549(7) . ?
C8 C9 1.404(6) . ?
C9 C17 1.441(6) . ?
C9 C10 1.459(7) . ?
C10 C11 1.449(7) . ?
C11 C12 1.259(8) . ?
C11 H11 0.9300 . ?
C13 C14 1.455(11) . ?
C14 H14A 0.9600 . ?
C14 H14B 0.9600 . ?
C14 H14C 0.9600 . ?
C15 H15A 0.9600 . ?
C15 H15B 0.9600 . ?
C15 H15C 0.9600 . ?
C16 H16A 0.9600 . ?
C16 H16B 0.9600 . ?
C16 H16C 0.9600 . ?
C17 C18 1.493(6) . ?
C18 H18A 0.9600 . ?
C18 H18B 0.9600 . ?
C18 H18C 0.9600 . ?
C19 C20 1.513(6) . ?
C19 C49 1.546(6) . ?
C19 H19 0.9800 . ?
C20 C21 1.488(6) . ?
C20 H20A 0.9700 . ?
C20 H20B 0.9700 . ?
C21 C51 1.528(6) . ?
C21 H21A 0.9700 . ?
C21 H21B 0.9700 . ?
N31 C47 1.305(5) . ?
N31 C49 1.447(5) . ?
N31 H31 0.8600 . ?
O31 C42 1.381(5) . ?
O31 C31 1.402(5) . ?
O32 C43 1.253(5) . ?
O33 C33 1.351(5) . ?
O33 H33 0.8200 . ?
O34 C35 1.364(5) . ?
O34 H34 0.8200 . ?
O35 C38 1.253(5) . ?
O36 C40 1.266(5) . ?
C31 C36 1.348(5) . ?
C31 C32 1.384(6) . ?
C32 C33 1.445(6) . ?
C32 C43 1.456(6) . ?
C33 C34 1.384(6) . ?
C34 C35 1.409(6) . ?
C34 C45 1.497(6) . ?
C35 C36 1.392(6) . ?
C36 C37 1.507(5) . ?
C37 C42 1.499(6) . ?
C37 C38 1.525(6) . ?
C37 C46 1.554(6) . ?
C38 C39 1.434(6) . ?
C39 C40 1.450(6) . ?
C39 C47 1.447(6) . ?
C40 C41 1.454(6) . ?
C41 C42 1.304(6) . ?
C41 H41 0.9300 . ?
C43 C44 1.483(6) . ?
C44 H44A 0.9600 . ?
C44 H44B 0.9600 . ?
C44 H44C 0.9600 . ?
C45 H45A 0.9600 . ?
C45 H45B 0.9600 . ?
C45 H45C 0.9600 . ?
C46 H46A 0.9600 . ?
C46 H46B 0.9600 . ?
C46 H46C 0.9600 . ?
C47 C48 1.520(6) . ?
C48 H48A 0.9600 . ?
C48 H48B 0.9600 . ?
C48 H48C 0.9600 . ?
C49 C50 1.507(6) . ?
C49 H49 0.9800 . ?
C50 C51 1.537(6) . ?
C50 H50A 0.9700 . ?
C50 H50B 0.9700 . ?
C51 H51A 0.9700 . ?
C51 H51B 0.9700 . ?
N61 C77 1.304(5) . ?
N61 C79 1.490(5) . ?
N61 H61 0.8600 . ?
O61 C72 1.388(5) . ?
O61 C61 1.407(5) . ?
O62 C73 1.228(5) . ?
O63 C63 1.342(5) . ?
O63 H63 0.8200 . ?
O64 C65 1.353(6) . ?
O64 H64 0.8200 . ?
O65 C68 1.255(5) . ?
O66 C70 1.278(5) . ?
C61 C66 1.358(6) . ?
C61 C62 1.399(6) . ?
C62 C63 1.414(6) . ?
C62 C73 1.472(7) . ?
C63 C64 1.378(7) . ?
C64 C65 1.383(6) . ?
C64 C75 1.532(6) . ?
C65 C66 1.394(6) . ?
C66 C67 1.542(6) . ?
C67 C72 1.475(6) . ?
C67 C68 1.508(6) . ?
C67 C76 1.557(6) . ?
C68 C69 1.447(6) . ?
C69 C70 1.426(6) . ?
C69 C77 1.433(6) . ?
C70 C71 1.449(6) . ?
C71 C72 1.305(6) . ?
C71 H71 0.9300 . ?
C73 C74 1.506(7) . ?
C74 H74A 0.9600 . ?
C74 H74B 0.9600 . ?
C74 H74C 0.9600 . ?
C75 H75A 0.9600 . ?
C75 H75B 0.9600 . ?
C75 H75C 0.9600 . ?
C76 H76A 0.9600 . ?
C76 H76B 0.9600 . ?
C76 H76C 0.9600 . ?
C77 C78 1.491(6) . ?
C78 H78A 0.9600 . ?
C78 H78B 0.9600 . ?
C78 H78C 0.9600 . ?
C79 C80 1.532(6) . ?
C79 C109 1.536(6) . ?
C79 H79 0.9800 . ?
C80 C81 1.531(6) . ?
C80 H80A 0.9700 . ?
C80 H80B 0.9700 . ?
C81 C111 1.546(6) . ?
C81 H81A 0.9700 . ?
C81 H81B 0.9700 . ?
N91 C107 1.315(5) . ?
N91 C109 1.454(5) . ?
N91 H91 0.8600 . ?
O91 C102 1.369(5) . ?
O91 C91 1.396(5) . ?
O92 C103 1.258(5) . ?
O93 C93 1.368(5) . ?
O93 H93 0.8200 . ?
O94 C95 1.330(5) . ?
O94 H94 0.8200 . ?
O95 C98 1.250(5) . ?
O96 C100 1.270(5) . ?
C91 C96 1.376(6) . ?
C91 C92 1.398(5) . ?
C92 C93 1.405(7) . ?
C92 C103 1.443(7) . ?
C93 C94 1.396(6) . ?
C94 C95 1.388(6) . ?
C94 C105 1.520(6) . ?
C95 C96 1.413(6) . ?
C96 C97 1.493(5) . ?
C97 C102 1.492(6) . ?
C97 C98 1.540(5) . ?
C97 C106 1.563(6) . ?
C98 C99 1.434(6) . ?
C99 C107 1.438(5) . ?
C99 C100 1.456(6) . ?
C100 C101 1.469(6) . ?
C101 C102 1.327(6) . ?
C101 H101 0.9300 . ?
C103 C104 1.512(7) . ?
C104 H10A 0.9600 . ?
C104 H10B 0.9600 . ?
C104 H10C 0.9600 . ?
C105 H10D 0.9600 . ?
C105 H10E 0.9600 . ?
C105 H10F 0.9600 . ?
C106 H10G 0.9600 . ?
C106 H10H 0.9600 . ?
C106 H10I 0.9600 . ?
C107 C108 1.473(6) . ?
C108 H10J 0.9600 . ?
C108 H10K 0.9600 . ?
C108 H10L 0.9600 . ?
C109 C110 1.524(6) . ?
C109 H109 0.9800 . ?
C110 C111 1.525(5) . ?
C110 H11A 0.9700 . ?
C110 H11B 0.9700 . ?
C111 H11C 0.9700 . ?
C111 H11D 0.9700 . ?

loop_
 _geom_angle_atom_site_label_1
 _geom_angle_atom_site_label_2
 _geom_angle_atom_site_label_3
 _geom_angle
 _geom_angle_site_symmetry_1
 _geom_angle_site_symmetry_3
 _geom_angle_publ_flag
C17 N1 C19 130.0(4) . . ?
C17 N1 H1 115.0 . . ?
C19 N1 H1 115.0 . . ?
C1 O1 C12 102.8(5) . . ?
C3 O3 H3 109.4 . . ?
C5 O4 H4 109.4 . . ?
O1 C1 C6 118.2(6) . . ?
O1 C1 C2 119.8(6) . . ?
C6 C1 C2 121.9(7) . . ?
C3 C2 C13 120.7(7) . . ?
C3 C2 C1 111.6(7) . . ?
C13 C2 C1 127.4(8) . . ?
C2 C3 C4 130.2(7) . . ?
C2 C3 O3 122.5(8) . . ?
C4 C3 O3 107.4(7) . . ?
C3 C4 C15 132.4(7) . . ?
C3 C4 C5 110.2(7) . . ?
C15 C4 C5 117.4(8) . . ?
C6 C5 O4 130.9(7) . . ?
C6 C5 C4 119.4(7) . . ?
O4 C5 C4 109.6(7) . . ?
C5 C6 C1 126.5(7) . . ?
C5 C6 C7 126.7(7) . . ?
C1 C6 C7 106.0(6) . . ?
C8 C7 C6 123.2(5) . . ?
C8 C7 C12 111.8(4) . . ?
C6 C7 C12 96.6(5) . . ?
C8 C7 C16 104.3(4) . . ?
C6 C7 C16 109.2(4) . . ?
C12 C7 C16 111.7(4) . . ?
O5 C8 C9 125.9(5) . . ?
O5 C8 C7 116.5(4) . . ?
C9 C8 C7 117.1(5) . . ?
C8 C9 C17 120.6(4) . . ?
C8 C9 C10 120.4(4) . . ?
C17 C9 C10 119.0(4) . . ?
O6 C10 C11 115.3(5) . . ?
O6 C10 C9 124.6(4) . . ?
C11 C10 C9 119.8(5) . . ?
C12 C11 C10 118.8(6) . . ?
C12 C11 H11 120.6 . . ?
C10 C11 H11 120.6 . . ?
C11 C12 O1 123.4(6) . . ?
C11 C12 C7 125.8(5) . . ?
O1 C12 C7 110.7(6) . . ?
O2 C13 C2 118.8(9) . . ?
O2 C13 C14 120.1(8) . . ?
C2 C13 C14 119.4(7) . . ?
C13 C14 H14A 109.5 . . ?
C13 C14 H14B 109.5 . . ?
H14A C14 H14B 109.5 . . ?
C13 C14 H14C 109.5 . . ?
H14A C14 H14C 109.5 . . ?
H14B C14 H14C 109.5 . . ?
C4 C15 H15A 109.5 . . ?
C4 C15 H15B 109.5 . . ?
H15A C15 H15B 109.5 . . ?
C4 C15 H15C 109.5 . . ?
H15A C15 H15C 109.5 . . ?
H15B C15 H15C 109.5 . . ?
C7 C16 H16A 109.5 . . ?
C7 C16 H16B 109.5 . . ?
H16A C16 H16B 109.5 . . ?
C7 C16 H16C 109.5 . . ?
H16A C16 H16C 109.5 . . ?
H16B C16 H16C 109.5 . . ?
N1 C17 C9 118.6(4) . . ?
N1 C17 C18 118.8(4) . . ?
C9 C17 C18 122.6(4) . . ?
C17 C18 H18A 109.5 . . ?
C17 C18 H18B 109.5 . . ?
H18A C18 H18B 109.5 . . ?
C17 C18 H18C 109.5 . . ?
H18A C18 H18C 109.5 . . ?
H18B C18 H18C 109.5 . . ?
N1 C19 C20 111.7(3) . . ?
N1 C19 C49 110.7(3) . . ?
C20 C19 C49 109.2(3) . . ?
N1 C19 H19 108.4 . . ?
C20 C19 H19 108.4 . . ?
C49 C19 H19 108.4 . . ?
C21 C20 C19 112.4(4) . . ?
C21 C20 H20A 109.1 . . ?
C19 C20 H20A 109.1 . . ?
C21 C20 H20B 109.1 . . ?
C19 C20 H20B 109.1 . . ?
H20A C20 H20B 107.9 . . ?
C20 C21 C51 110.7(4) . . ?
C20 C21 H21A 109.5 . . ?
C51 C21 H21A 109.5 . . ?
C20 C21 H21B 109.5 . . ?
C51 C21 H21B 109.5 . . ?
H21A C21 H21B 108.1 . . ?
C47 N31 C49 130.9(4) . . ?
C47 N31 H31 114.6 . . ?
C49 N31 H31 114.6 . . ?
C42 O31 C31 105.6(3) . . ?
C33 O33 H33 109.5 . . ?
C35 O34 H34 109.5 . . ?
C36 C31 C32 125.3(4) . . ?
C36 C31 O31 112.0(3) . . ?
C32 C31 O31 122.7(4) . . ?
C31 C32 C33 113.7(4) . . ?
C31 C32 C43 127.0(4) . . ?
C33 C32 C43 119.1(4) . . ?
O33 C33 C34 116.0(4) . . ?
O33 C33 C32 120.4(4) . . ?
C34 C33 C32 123.6(4) . . ?
C33 C34 C35 117.3(4) . . ?
C33 C34 C45 122.0(4) . . ?
C35 C34 C45 120.7(4) . . ?
O34 C35 C36 122.1(3) . . ?
O34 C35 C34 117.2(4) . . ?
C36 C35 C34 120.7(4) . . ?
C31 C36 C35 119.3(4) . . ?
C31 C36 C37 108.7(4) . . ?
C35 C36 C37 131.2(4) . . ?
C42 C37 C36 98.8(3) . . ?
C42 C37 C38 111.7(4) . . ?
C36 C37 C38 122.0(4) . . ?
C42 C37 C46 108.9(4) . . ?
C36 C37 C46 109.8(3) . . ?
C38 C37 C46 105.2(3) . . ?
O35 C38 C39 127.0(4) . . ?
O35 C38 C37 115.5(4) . . ?
C39 C38 C37 116.9(4) . . ?
C38 C39 C40 119.6(4) . . ?
C38 C39 C47 120.9(4) . . ?
C40 C39 C47 119.5(4) . . ?
O36 C40 C39 122.4(4) . . ?
O36 C40 C41 117.9(4) . . ?
C39 C40 C41 119.5(4) . . ?
C42 C41 C40 119.7(4) . . ?
C42 C41 H41 120.1 . . ?
C40 C41 H41 120.1 . . ?
C41 C42 O31 125.7(4) . . ?
C41 C42 C37 123.7(4) . . ?
O31 C42 C37 110.6(4) . . ?
O32 C43 C32 122.2(4) . . ?
O32 C43 C44 117.2(4) . . ?
C32 C43 C44 120.5(4) . . ?
C43 C44 H44A 109.5 . . ?
C43 C44 H44B 109.5 . . ?
H44A C44 H44B 109.5 . . ?
C43 C44 H44C 109.5 . . ?
H44A C44 H44C 109.5 . . ?
H44B C44 H44C 109.5 . . ?
C34 C45 H45A 109.5 . . ?
C34 C45 H45B 109.5 . . ?
H45A C45 H45B 109.5 . . ?
C34 C45 H45C 109.5 . . ?
H45A C45 H45C 109.5 . . ?
H45B C45 H45C 109.5 . . ?
C37 C46 H46A 109.5 . . ?
C37 C46 H46B 109.5 . . ?
H46A C46 H46B 109.5 . . ?
C37 C46 H46C 109.5 . . ?
H46A C46 H46C 109.5 . . ?
H46B C46 H46C 109.5 . . ?
N31 C47 C39 119.8(4) . . ?
N31 C47 C48 120.0(4) . . ?
C39 C47 C48 120.2(4) . . ?
C47 C48 H48A 109.5 . . ?
C47 C48 H48B 109.5 . . ?
H48A C48 H48B 109.5 . . ?
C47 C48 H48C 109.5 . . ?
H48A C48 H48C 109.5 . . ?
H48B C48 H48C 109.5 . . ?
N31 C49 C50 110.9(4) . . ?
N31 C49 C19 109.7(3) . . ?
C50 C49 C19 110.6(4) . . ?
N31 C49 H49 108.5 . . ?
C50 C49 H49 108.5 . . ?
C19 C49 H49 108.5 . . ?
C49 C50 C51 111.6(4) . . ?
C49 C50 H50A 109.3 . . ?
C51 C50 H50A 109.3 . . ?
C49 C50 H50B 109.3 . . ?
C51 C50 H50B 109.3 . . ?
H50A C50 H50B 108.0 . . ?
C21 C51 C50 111.7(4) . . ?
C21 C51 H51A 109.3 . . ?
C50 C51 H51A 109.3 . . ?
C21 C51 H51B 109.3 . . ?
C50 C51 H51B 109.3 . . ?
H51A C51 H51B 107.9 . . ?
C77 N61 C79 129.6(4) . . ?
C77 N61 H61 115.2 . . ?
C79 N61 H61 115.2 . . ?
C72 O61 C61 106.7(3) . . ?
C63 O63 H63 109.5 . . ?
C65 O64 H64 109.5 . . ?
C66 C61 C62 124.5(4) . . ?
C66 C61 O61 111.9(4) . . ?
C62 C61 O61 123.6(4) . . ?
C61 C62 C63 114.1(4) . . ?
C61 C62 C73 125.2(4) . . ?
C63 C62 C73 120.7(4) . . ?
O63 C63 C64 117.9(4) . . ?
O63 C63 C62 119.5(5) . . ?
C64 C63 C62 122.5(4) . . ?
C65 C64 C63 120.5(4) . . ?
C65 C64 C75 118.5(5) . . ?
C63 C64 C75 121.1(4) . . ?
O64 C65 C64 119.8(4) . . ?
O64 C65 C66 121.4(4) . . ?
C64 C65 C66 118.8(5) . . ?
C61 C66 C65 119.6(4) . . ?
C61 C66 C67 107.4(4) . . ?
C65 C66 C67 132.6(4) . . ?
C72 C67 C68 112.6(4) . . ?
C72 C67 C66 100.3(3) . . ?
C68 C67 C66 119.7(4) . . ?
C72 C67 C76 109.6(3) . . ?
C68 C67 C76 105.7(4) . . ?
C66 C67 C76 108.6(3) . . ?
O65 C68 C69 125.7(4) . . ?
O65 C68 C67 117.6(4) . . ?
C69 C68 C67 116.3(4) . . ?
C70 C69 C77 121.3(4) . . ?
C70 C69 C68 118.0(4) . . ?
C77 C69 C68 120.7(4) . . ?
O66 C70 C69 121.9(4) . . ?
O66 C70 C71 116.8(4) . . ?
C69 C70 C71 121.1(4) . . ?
C72 C71 C70 118.2(4) . . ?
C72 C71 H71 120.9 . . ?
C70 C71 H71 120.9 . . ?
C71 C72 O61 125.8(4) . . ?
C71 C72 C67 123.5(4) . . ?
O61 C72 C67 110.6(3) . . ?
O62 C73 C62 120.1(5) . . ?
O62 C73 C74 118.3(5) . . ?
C62 C73 C74 121.6(4) . . ?
C73 C74 H74A 109.5 . . ?
C73 C74 H74B 109.5 . . ?
H74A C74 H74B 109.5 . . ?
C73 C74 H74C 109.5 . . ?
H74A C74 H74C 109.5 . . ?
H74B C74 H74C 109.5 . . ?
C64 C75 H75A 109.5 . . ?
C64 C75 H75B 109.5 . . ?
H75A C75 H75B 109.5 . . ?
C64 C75 H75C 109.5 . . ?
H75A C75 H75C 109.5 . . ?
H75B C75 H75C 109.5 . . ?
C67 C76 H76A 109.5 . . ?
C67 C76 H76B 109.5 . . ?
H76A C76 H76B 109.5 . . ?
C67 C76 H76C 109.5 . . ?
H76A C76 H76C 109.5 . . ?
H76B C76 H76C 109.5 . . ?
N61 C77 C69 119.2(4) . . ?
N61 C77 C78 119.0(4) . . ?
C69 C77 C78 121.8(4) . . ?
C77 C78 H78A 109.5 . . ?
C77 C78 H78B 109.5 . . ?
H78A C78 H78B 109.5 . . ?
C77 C78 H78C 109.5 . . ?
H78A C78 H78C 109.5 . . ?
H78B C78 H78C 109.5 . . ?
N61 C79 C80 108.4(4) . . ?
N61 C79 C109 108.6(3) . . ?
C80 C79 C109 111.1(4) . . ?
N61 C79 H79 109.6 . . ?
C80 C79 H79 109.6 . . ?
C109 C79 H79 109.6 . . ?
C81 C80 C79 110.7(4) . . ?
C81 C80 H80A 109.5 . . ?
C79 C80 H80A 109.5 . . ?
C81 C80 H80B 109.5 . . ?
C79 C80 H80B 109.5 . . ?
H80A C80 H80B 108.1 . . ?
C80 C81 C111 110.2(4) . . ?
C80 C81 H81A 109.6 . . ?
C111 C81 H81A 109.6 . . ?
C80 C81 H81B 109.6 . . ?
C111 C81 H81B 109.6 . . ?
H81A C81 H81B 108.1 . . ?
C107 N91 C109 128.9(4) . . ?
C107 N91 H91 115.6 . . ?
C109 N91 H91 115.6 . . ?
C102 O91 C91 106.4(3) . . ?
C93 O93 H93 109.5 . . ?
C95 O94 H94 109.5 . . ?
C96 C91 O91 111.4(3) . . ?
C96 C91 C92 123.8(4) . . ?
O91 C91 C92 124.8(4) . . ?
C93 C92 C91 114.8(4) . . ?
C93 C92 C103 121.2(4) . . ?
C91 C92 C103 124.0(4) . . ?
O93 C93 C94 116.9(4) . . ?
O93 C93 C92 119.7(4) . . ?
C94 C93 C92 123.4(4) . . ?
C93 C94 C95 119.4(4) . . ?
C93 C94 C105 121.5(4) . . ?
C95 C94 C105 119.1(4) . . ?
O94 C95 C94 118.7(4) . . ?
O94 C95 C96 122.4(4) . . ?
C94 C95 C96 118.9(4) . . ?
C91 C96 C95 119.6(4) . . ?
C91 C96 C97 107.3(4) . . ?
C95 C96 C97 132.2(4) . . ?
C96 C97 C102 100.0(3) . . ?
C96 C97 C98 120.4(4) . . ?
C102 C97 C98 113.5(3) . . ?
C96 C97 C106 107.7(3) . . ?
C102 C97 C106 110.4(4) . . ?
C98 C97 C106 104.8(3) . . ?
O95 C98 C99 126.0(4) . . ?
O95 C98 C97 116.0(4) . . ?
C99 C98 C97 117.6(4) . . ?
C98 C99 C107 120.9(4) . . ?
C98 C99 C100 118.7(3) . . ?
C107 C99 C100 120.4(4) . . ?
O96 C100 C99 122.2(3) . . ?
O96 C100 C101 116.4(4) . . ?
C99 C100 C101 121.2(3) . . ?
C102 C101 C100 118.2(4) . . ?
C102 C101 H101 120.9 . . ?
C100 C101 H101 120.9 . . ?
C101 C102 O91 126.2(4) . . ?
C101 C102 C97 123.7(4) . . ?
O91 C102 C97 110.0(3) . . ?
O92 C103 C92 121.1(5) . . ?
O92 C103 C104 117.4(5) . . ?
C92 C103 C104 121.5(4) . . ?
C103 C104 H10A 109.5 . . ?
C103 C104 H10B 109.5 . . ?
H10A C104 H10B 109.5 . . ?
C103 C104 H10C 109.5 . . ?
H10A C104 H10C 109.5 . . ?
H10B C104 H10C 109.5 . . ?
C94 C105 H10D 109.5 . . ?
C94 C105 H10E 109.5 . . ?
H10D C105 H10E 109.5 . . ?
C94 C105 H10F 109.5 . . ?
H10D C105 H10F 109.5 . . ?
H10E C105 H10F 109.5 . . ?
C97 C106 H10G 109.5 . . ?
C97 C106 H10H 109.5 . . ?
H10G C106 H10H 109.5 . . ?
C97 C106 H10I 109.5 . . ?
H10G C106 H10I 109.5 . . ?
H10H C106 H10I 109.5 . . ?
N91 C107 C99 119.3(4) . . ?
N91 C107 C108 120.9(3) . . ?
C99 C107 C108 119.8(4) . . ?
C107 C108 H10J 109.5 . . ?
C107 C108 H10K 109.5 . . ?
H10J C108 H10K 109.5 . . ?
C107 C108 H10L 109.5 . . ?
H10J C108 H10L 109.5 . . ?
H10K C108 H10L 109.5 . . ?
N91 C109 C110 110.9(3) . . ?
N91 C109 C79 110.3(3) . . ?
C110 C109 C79 110.2(3) . . ?
N91 C109 H109 108.4 . . ?
C110 C109 H109 108.4 . . ?
C79 C109 H109 108.4 . . ?
C111 C110 C109 110.1(4) . . ?
C111 C110 H11A 109.6 . . ?
C109 C110 H11A 109.7 . . ?
C111 C110 H11B 109.6 . . ?
C109 C110 H11B 109.6 . . ?
H11A C110 H11B 108.2 . . ?
C110 C111 C81 111.7(4) . . ?
C110 C111 H11C 109.3 . . ?
C81 C111 H11C 109.3 . . ?
C110 C111 H11D 109.3 . . ?
C81 C111 H11D 109.3 . . ?
H11C C111 H11D 107.9 . . ?

loop_
 _geom_torsion_atom_site_label_1
 _geom_torsion_atom_site_label_2
 _geom_torsion_atom_site_label_3
 _geom_torsion_atom_site_label_4
 _geom_torsion
 _geom_torsion_site_symmetry_1
 _geom_torsion_site_symmetry_2
 _geom_torsion_site_symmetry_3
 _geom_torsion_site_symmetry_4
 _geom_torsion_publ_flag
C12 O1 C1 C6 -6.4(6) . . . . ?
C12 O1 C1 C2 176.0(5) . . . . ?
O1 C1 C2 C3 175.9(5) . . . . ?
C6 C1 C2 C3 -1.6(8) . . . . ?
O1 C1 C2 C13 -10.6(9) . . . . ?
C6 C1 C2 C13 171.9(6) . . . . ?
C13 C2 C3 C4 -170.6(6) . . . . ?
C1 C2 C3 C4 3.4(9) . . . . ?
C13 C2 C3 O3 9.4(9) . . . . ?
C1 C2 C3 O3 -176.5(5) . . . . ?
C2 C3 C4 C15 179.7(7) . . . . ?
O3 C3 C4 C15 -0.4(9) . . . . ?
C2 C3 C4 C5 -1.7(9) . . . . ?
O3 C3 C4 C5 178.2(4) . . . . ?
C3 C4 C5 C6 -2.0(8) . . . . ?
C15 C4 C5 C6 176.8(6) . . . . ?
C3 C4 C5 O4 -179.8(5) . . . . ?
C15 C4 C5 O4 -1.0(7) . . . . ?
O4 C5 C6 C1 -179.0(6) . . . . ?
C4 C5 C6 C1 3.9(10) . . . . ?
O4 C5 C6 C7 12.4(11) . . . . ?
C4 C5 C6 C7 -164.7(5) . . . . ?
O1 C1 C6 C5 -179.6(6) . . . . ?
C2 C1 C6 C5 -2.0(9) . . . . ?
O1 C1 C6 C7 -9.0(6) . . . . ?
C2 C1 C6 C7 168.5(5) . . . . ?
C5 C6 C7 C8 -49.5(9) . . . . ?
C1 C6 C7 C8 140.0(6) . . . . ?
C5 C6 C7 C12 -171.0(6) . . . . ?
C1 C6 C7 C12 18.5(5) . . . . ?
C5 C6 C7 C16 73.2(7) . . . . ?
C1 C6 C7 C16 -97.3(6) . . . . ?
C6 C7 C8 O5 47.4(8) . . . . ?
C12 C7 C8 O5 161.6(4) . . . . ?
C16 C7 C8 O5 -77.5(6) . . . . ?
C6 C7 C8 C9 -140.4(5) . . . . ?
C12 C7 C8 C9 -26.1(6) . . . . ?
C16 C7 C8 C9 94.8(5) . . . . ?
O5 C8 C9 C17 3.2(8) . . . . ?
C7 C8 C9 C17 -168.3(4) . . . . ?
O5 C8 C9 C10 -176.4(5) . . . . ?
C7 C8 C9 C10 12.1(6) . . . . ?
C8 C9 C10 O6 -178.6(4) . . . . ?
C17 C9 C10 O6 1.8(7) . . . . ?
C8 C9 C10 C11 8.4(6) . . . . ?
C17 C9 C10 C11 -171.3(4) . . . . ?
O6 C10 C11 C12 173.7(5) . . . . ?
C9 C10 C11 C12 -12.6(7) . . . . ?
C10 C11 C12 O1 172.2(4) . . . . ?
C10 C11 C12 C7 -4.8(8) . . . . ?
C1 O1 C12 C11 -157.6(6) . . . . ?
C1 O1 C12 C7 19.7(5) . . . . ?
C8 C7 C12 C11 24.0(8) . . . . ?
C6 C7 C12 C11 153.8(6) . . . . ?
C16 C7 C12 C11 -92.5(6) . . . . ?
C8 C7 C12 O1 -153.3(4) . . . . ?
C6 C7 C12 O1 -23.5(5) . . . . ?
C16 C7 C12 O1 90.3(5) . . . . ?
C3 C2 C13 O2 -24.3(10) . . . . ?
C1 C2 C13 O2 162.7(6) . . . . ?
C3 C2 C13 C14 170.8(7) . . . . ?
C1 C2 C13 C14 -2.2(11) . . . . ?
C19 N1 C17 C9 177.7(4) . . . . ?
C19 N1 C17 C18 -1.1(6) . . . . ?
C8 C9 C17 N1 173.2(4) . . . . ?
C10 C9 C17 N1 -7.1(6) . . . . ?
C8 C9 C17 C18 -8.0(7) . . . . ?
C10 C9 C17 C18 171.6(4) . . . . ?
C17 N1 C19 C20 135.9(4) . . . . ?
C17 N1 C19 C49 -102.2(5) . . . . ?
N1 C19 C20 C21 -178.3(4) . . . . ?
C49 C19 C20 C21 58.9(5) . . . . ?
C19 C20 C21 C51 -57.2(5) . . . . ?
C42 O31 C31 C36 -5.1(4) . . . . ?
C42 O31 C31 C32 174.1(4) . . . . ?
C36 C31 C32 C33 0.8(6) . . . . ?
O31 C31 C32 C33 -178.3(3) . . . . ?
C36 C31 C32 C43 -175.9(4) . . . . ?
O31 C31 C32 C43 5.0(6) . . . . ?
C31 C32 C33 O33 177.3(4) . . . . ?
C43 C32 C33 O33 -5.8(6) . . . . ?
C31 C32 C33 C34 -3.0(6) . . . . ?
C43 C32 C33 C34 173.9(4) . . . . ?
O33 C33 C34 C35 -177.4(3) . . . . ?
C32 C33 C34 C35 2.9(6) . . . . ?
O33 C33 C34 C45 1.6(6) . . . . ?
C32 C33 C34 C45 -178.1(4) . . . . ?
C33 C34 C35 O34 178.1(4) . . . . ?
C45 C34 C35 O34 -0.8(6) . . . . ?
C33 C34 C35 C36 -0.6(6) . . . . ?
C45 C34 C35 C36 -179.6(4) . . . . ?
C32 C31 C36 C35 1.4(6) . . . . ?
O31 C31 C36 C35 -179.5(3) . . . . ?
C32 C31 C36 C37 172.1(4) . . . . ?
O31 C31 C36 C37 -8.7(4) . . . . ?
O34 C35 C36 C31 179.8(4) . . . . ?
C34 C35 C36 C31 -1.5(6) . . . . ?
O34 C35 C36 C37 11.5(7) . . . . ?
C34 C35 C36 C37 -169.8(4) . . . . ?
C31 C36 C37 C42 17.3(4) . . . . ?
C35 C36 C37 C42 -173.4(4) . . . . ?
C31 C36 C37 C38 139.9(4) . . . . ?
C35 C36 C37 C38 -50.9(6) . . . . ?
C31 C36 C37 C46 -96.5(4) . . . . ?
C35 C36 C37 C46 72.8(5) . . . . ?
C42 C37 C38 O35 155.8(3) . . . . ?
C36 C37 C38 O35 39.5(5) . . . . ?
C46 C37 C38 O35 -86.2(4) . . . . ?
C42 C37 C38 C39 -32.0(5) . . . . ?
C36 C37 C38 C39 -148.3(4) . . . . ?
C46 C37 C38 C39 85.9(4) . . . . ?
O35 C38 C39 C40 -173.6(4) . . . . ?
C37 C38 C39 C40 15.3(5) . . . . ?
O35 C38 C39 C47 6.5(6) . . . . ?
C37 C38 C39 C47 -164.7(4) . . . . ?
C38 C39 C40 O36 -176.1(4) . . . . ?
C47 C39 C40 O36 3.8(6) . . . . ?
C38 C39 C40 C41 7.6(6) . . . . ?
C47 C39 C40 C41 -172.5(4) . . . . ?
O36 C40 C41 C42 171.8(4) . . . . ?
C39 C40 C41 C42 -11.7(6) . . . . ?
C40 C41 C42 O31 172.3(4) . . . . ?
C40 C41 C42 C37 -8.5(7) . . . . ?
C31 O31 C42 C41 -163.6(4) . . . . ?
C31 O31 C42 C37 17.1(4) . . . . ?
C36 C37 C42 C41 159.7(4) . . . . ?
C38 C37 C42 C41 30.0(6) . . . . ?
C46 C37 C42 C41 -85.8(5) . . . . ?
C36 C37 C42 O31 -21.0(4) . . . . ?
C38 C37 C42 O31 -150.7(3) . . . . ?
C46 C37 C42 O31 93.6(4) . . . . ?
C31 C32 C43 O32 -173.2(4) . . . . ?
C33 C32 C43 O32 10.3(6) . . . . ?
C31 C32 C43 C44 7.1(7) . . . . ?
C33 C32 C43 C44 -169.4(4) . . . . ?
C49 N31 C47 C39 174.3(4) . . . . ?
C49 N31 C47 C48 -6.0(7) . . . . ?
C38 C39 C47 N31 173.4(4) . . . . ?
C40 C39 C47 N31 -6.5(6) . . . . ?
C38 C39 C47 C48 -6.3(6) . . . . ?
C40 C39 C47 C48 173.7(4) . . . . ?
C47 N31 C49 C50 142.1(5) . . . . ?
C47 N31 C49 C19 -95.4(5) . . . . ?
N1 C19 C49 N31 56.8(5) . . . . ?
C20 C19 C49 N31 -179.8(4) . . . . ?
N1 C19 C49 C50 179.4(3) . . . . ?
C20 C19 C49 C50 -57.2(5) . . . . ?
N31 C49 C50 C51 177.0(4) . . . . ?
C19 C49 C50 C51 55.1(5) . . . . ?
C20 C21 C51 C50 53.3(6) . . . . ?
C49 C50 C51 C21 -53.2(6) . . . . ?
C72 O61 C61 C66 -5.5(4) . . . . ?
C72 O61 C61 C62 176.2(4) . . . . ?
C66 C61 C62 C63 0.9(6) . . . . ?
O61 C61 C62 C63 179.1(4) . . . . ?
C66 C61 C62 C73 179.5(4) . . . . ?
O61 C61 C62 C73 -2.3(7) . . . . ?
C61 C62 C63 O63 180.0(4) . . . . ?
C73 C62 C63 O63 1.3(6) . . . . ?
C61 C62 C63 C64 0.4(6) . . . . ?
C73 C62 C63 C64 -178.3(4) . . . . ?
O63 C63 C64 C65 179.2(4) . . . . ?
C62 C63 C64 C65 -1.2(7) . . . . ?
O63 C63 C64 C75 -0.3(6) . . . . ?
C62 C63 C64 C75 179.3(4) . . . . ?
C63 C64 C65 O64 -179.3(4) . . . . ?
C75 C64 C65 O64 0.2(6) . . . . ?
C63 C64 C65 C66 0.8(6) . . . . ?
C75 C64 C65 C66 -179.7(4) . . . . ?
C62 C61 C66 C65 -1.4(7) . . . . ?
O61 C61 C66 C65 -179.7(4) . . . . ?
C62 C61 C66 C67 172.3(4) . . . . ?
O61 C61 C66 C67 -6.0(5) . . . . ?
O64 C65 C66 C61 -179.5(4) . . . . ?
C64 C65 C66 C61 0.5(6) . . . . ?
O64 C65 C66 C67 8.8(7) . . . . ?
C64 C65 C66 C67 -171.3(4) . . . . ?
C61 C66 C67 C72 14.1(4) . . . . ?
C65 C66 C67 C72 -173.4(4) . . . . ?
C61 C66 C67 C68 137.8(4) . . . . ?
C65 C66 C67 C68 -49.7(6) . . . . ?
C61 C66 C67 C76 -100.8(4) . . . . ?
C65 C66 C67 C76 71.7(6) . . . . ?
C72 C67 C68 O65 153.0(4) . . . . ?
C66 C67 C68 O65 35.6(6) . . . . ?
C76 C67 C68 O65 -87.3(5) . . . . ?
C72 C67 C68 C69 -33.8(5) . . . . ?
C66 C67 C68 C69 -151.3(4) . . . . ?
C76 C67 C68 C69 85.8(4) . . . . ?
O65 C68 C69 C70 -172.5(4) . . . . ?
C67 C68 C69 C70 14.9(6) . . . . ?
O65 C68 C69 C77 9.6(7) . . . . ?
C67 C68 C69 C77 -162.9(4) . . . . ?
C77 C69 C70 O66 4.1(6) . . . . ?
C68 C69 C70 O66 -173.7(4) . . . . ?
C77 C69 C70 C71 -171.0(4) . . . . ?
C68 C69 C70 C71 11.2(6) . . . . ?
O66 C70 C71 C72 167.8(4) . . . . ?
C69 C70 C71 C72 -16.9(6) . . . . ?
C70 C71 C72 O61 170.8(4) . . . . ?
C70 C71 C72 C67 -5.4(6) . . . . ?
C61 O61 C72 C71 -161.1(4) . . . . ?
C61 O61 C72 C67 15.5(4) . . . . ?
C68 C67 C72 C71 30.3(5) . . . . ?
C66 C67 C72 C71 158.7(4) . . . . ?
C76 C67 C72 C71 -87.1(5) . . . . ?
C68 C67 C72 O61 -146.4(3) . . . . ?
C66 C67 C72 O61 -18.0(4) . . . . ?
C76 C67 C72 O61 96.2(4) . . . . ?
C61 C62 C73 O62 -173.6(4) . . . . ?
C63 C62 C73 O62 4.9(7) . . . . ?
C61 C62 C73 C74 5.1(7) . . . . ?
C63 C62 C73 C74 -176.4(4) . . . . ?
C79 N61 C77 C69 169.3(4) . . . . ?
C79 N61 C77 C78 -11.9(6) . . . . ?
C70 C69 C77 N61 -5.4(6) . . . . ?
C68 C69 C77 N61 172.4(4) . . . . ?
C70 C69 C77 C78 175.8(4) . . . . ?
C68 C69 C77 C78 -6.4(6) . . . . ?
C77 N61 C79 C80 142.0(4) . . . . ?
C77 N61 C79 C109 -97.2(5) . . . . ?
N61 C79 C80 C81 176.3(4) . . . . ?
C109 C79 C80 C81 57.0(5) . . . . ?
C79 C80 C81 C111 -55.3(6) . . . . ?
C102 O91 C91 C96 -4.0(5) . . . . ?
C102 O91 C91 C92 177.3(4) . . . . ?
C96 C91 C92 C93 1.0(6) . . . . ?
O91 C91 C92 C93 179.5(4) . . . . ?
C96 C91 C92 C103 -178.6(4) . . . . ?
O91 C91 C92 C103 -0.1(7) . . . . ?
C91 C92 C93 O93 -178.7(4) . . . . ?
C103 C92 C93 O93 0.9(6) . . . . ?
C91 C92 C93 C94 0.3(6) . . . . ?
C103 C92 C93 C94 179.9(4) . . . . ?
O93 C93 C94 C95 178.6(4) . . . . ?
C92 C93 C94 C95 -0.4(7) . . . . ?
O93 C93 C94 C105 0.0(6) . . . . ?
C92 C93 C94 C105 -179.0(4) . . . . ?
C93 C94 C95 O94 -180.0(4) . . . . ?
C105 C94 C95 O94 -1.4(6) . . . . ?
C93 C94 C95 C96 -0.7(6) . . . . ?
C105 C94 C95 C96 177.9(4) . . . . ?
O91 C91 C96 C95 179.2(4) . . . . ?
C92 C91 C96 C95 -2.1(6) . . . . ?
O91 C91 C96 C97 -10.3(5) . . . . ?
C92 C91 C96 C97 168.4(4) . . . . ?
O94 C95 C96 C91 -178.8(4) . . . . ?
C94 C95 C96 C91 1.9(6) . . . . ?
O94 C95 C96 C97 13.5(7) . . . . ?
C94 C95 C96 C97 -165.8(4) . . . . ?
C91 C96 C97 C102 18.8(4) . . . . ?
C95 C96 C97 C102 -172.4(4) . . . . ?
C91 C96 C97 C98 143.7(4) . . . . ?
C95 C96 C97 C98 -47.5(6) . . . . ?
C91 C96 C97 C106 -96.5(4) . . . . ?
C95 C96 C97 C106 72.3(5) . . . . ?
C96 C97 C98 O95 41.8(5) . . . . ?
C102 C97 C98 O95 160.1(4) . . . . ?
C106 C97 C98 O95 -79.4(4) . . . . ?
C96 C97 C98 C99 -144.8(4) . . . . ?
C102 C97 C98 C99 -26.5(5) . . . . ?
C106 C97 C98 C99 93.9(4) . . . . ?
O95 C98 C99 C107 -0.2(7) . . . . ?
C97 C98 C99 C107 -172.8(4) . . . . ?
O95 C98 C99 C100 -179.1(4) . . . . ?
C97 C98 C99 C100 8.3(6) . . . . ?
C98 C99 C100 O96 -172.5(4) . . . . ?
C107 C99 C100 O96 8.6(6) . . . . ?
C98 C99 C100 C101 12.4(6) . . . . ?
C107 C99 C100 C101 -166.5(4) . . . . ?
O96 C100 C101 C102 171.4(4) . . . . ?
C99 C100 C101 C102 -13.2(6) . . . . ?
C100 C101 C102 O91 170.8(4) . . . . ?
C100 C101 C102 C97 -8.0(6) . . . . ?
C91 O91 C102 C101 -161.9(4) . . . . ?
C91 O91 C102 C97 17.0(4) . . . . ?
C96 C97 C102 C101 156.9(4) . . . . ?
C98 C97 C102 C101 27.4(6) . . . . ?
C106 C97 C102 C101 -89.8(5) . . . . ?
C96 C97 C102 O91 -22.1(4) . . . . ?
C98 C97 C102 O91 -151.6(3) . . . . ?
C106 C97 C102 O91 91.2(4) . . . . ?
C93 C92 C103 O92 -4.0(7) . . . . ?
C91 C92 C103 O92 175.6(4) . . . . ?
C93 C92 C103 C104 176.8(5) . . . . ?
C91 C92 C103 C104 -3.7(7) . . . . ?
C109 N91 C107 C99 179.5(4) . . . . ?
C109 N91 C107 C108 0.0(6) . . . . ?
C98 C99 C107 N91 168.6(4) . . . . ?
C100 C99 C107 N91 -12.6(6) . . . . ?
C98 C99 C107 C108 -12.0(6) . . . . ?
C100 C99 C107 C108 166.9(4) . . . . ?
C107 N91 C109 C110 132.8(4) . . . . ?
C107 N91 C109 C79 -104.8(5) . . . . ?
N61 C79 C109 N91 59.9(5) . . . . ?
C80 C79 C109 N91 179.1(4) . . . . ?
N61 C79 C109 C110 -177.3(3) . . . . ?
C80 C79 C109 C110 -58.1(5) . . . . ?
N91 C109 C110 C111 -179.8(4) . . . . ?
C79 C109 C110 C111 57.8(5) . . . . ?
C109 C110 C111 C81 -57.4(6) . . . . ?
C80 C81 C111 C110 56.2(6) . . . . ?

_diffrn_measured_fraction_theta_max    0.990
_diffrn_reflns_theta_full              27.00
_diffrn_measured_fraction_theta_full   0.990
_refine_diff_density_max    0.598
_refine_diff_density_min   -0.331
_refine_diff_density_rms    0.063
